# Supplementary material for: Molecular Characterization of an Ice Nucleation Protein Variant (InaQ) from Pseudomonas syringae and the Analysis of Its Transmembrane Transport Activity in Escherichia coli
Source: PubMed Central journal article supplement — Int J Biol Sci. 2012 Sep 1;8(8):1097–108. doi: 10.7150/ijbs.4524 (PMC3445048; doi:10.7150/ijbs.4524), 2012-09-01

## Supplementary Material

**Fig. S1** Hydrophobicity/hydrophilicity and signal peptide prediction of the InaQ domains using bioinformatics tools. (A) Hydrophobicity analysis of the InaQ-N domain. (B) Hydrophilicity analysis of the InaQ-C domain. (C) Signal peptide prediction of InaQ-N. C-score is the “cleavage site” score that should only be significantly high at the cleavage site. S-score is the value of every single amino acid position. Y-score is a derivative of the C-score combined with the S-score.

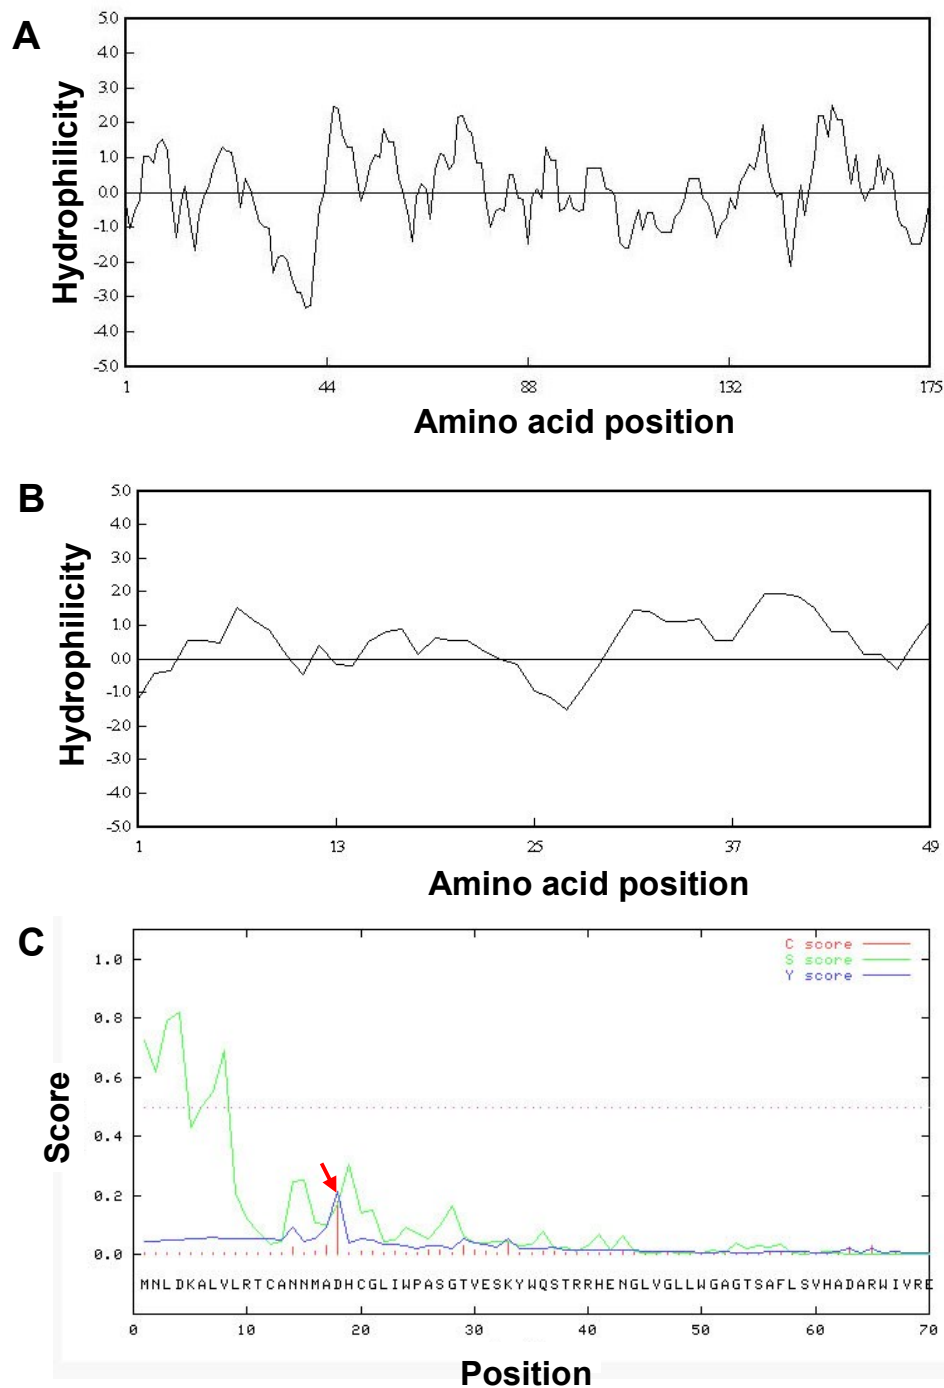

Supplement: ijbsv08p1097s1.pdf [file ijbsv08p1097s1.pdf]
